# Supplementary material for: Comparative Molecular Characterization of Novel and Known Piscine Toti-Like Viruses
Source: MDPI journal article supplement (doi:10.3390/v13061063), 2021-06-03
Supplement: s1 [file s1]

## Supplementary Text file S1

### Additional information and results on origin of, prevalence and detection of GSTLV-1, CCTLV-1, BGTLV-1 and CLuTLV

#### GSTLV-1

##### *Origin of samples and virus*

New whole genome sequencing and genomic analyses on GSTLV-1 (previously called golden shiner PMCV-like virus) was performed on an individual pool sample of five fish confirmed to have high viral loads using PCR analyses in our previous work [11]. Briefly, this sample originated in a study of golden shiners collected from retail baitshops located throughout Minnesota. Live fish were collected and delivered for diagnostic examination the same day to the University of Minnesota Veterinary Diagnostic Laboratory (UMVDL). At the UMVDL, kidney and spleen tissues were sampled, pooled and processed, and subjected to NGS analyses, from which the original partial genomic sequences of GSTLV-1 was identified and created the basis for the GSTLV-1 specific PCR used to identify the sample in this study.

#### CCTLV-1 and BGTLV-1

##### *Origin of samples and virus and prescence of viral genomic sequences in species and lakes*

Identification of viruses from common carp and bluegill, CCTLV-1 and BGTLV-1, originates in samples that belongs to a part of broad viral metagenomic study where dead fish were collected from natural mortality events in lakes distributed across the Upper Midwest region of the USA from June 2017 to October 2018. A total number of 22 bluegill tissue pools and 83 common carp tissue pools were included in the study. An overview of tissue pools and sampling location with positive detection of viral CCTLV-1 or BGTLV-1 sequences from dead wild fish in these lakes is shown in Table 1.

**Table 1**

| Virus   | Fish specie | Lake Name      | Tissue pool | Result               |
|---------|-------------|----------------|-------------|----------------------|
| CCTLV-1 | Common Carp | Ballantyne     | Kidney      | Near complete genome |
|         | Common Carp | Cottonwood     | Brain       | Partial genome       |
|         | Common Carp | Pamela         | Brain       | Partial genome       |
|         | Common Carp | Pamela         | Gill        | Partial genome       |
|         | Common Carp | Freeborn       | Kidney      | Partial genome       |
|         | Common Carp | Freeborn       | Spleen      | Partial genome       |
|         | Common Carp | Morehouse Park | Gill        | Partial genome       |
|         | Common Carp | Morehouse Park | Kidney      | Partial genome       |
|         | Common Carp | Morehouse Park | Spleen      | Partial genome       |
|         | Common Carp | Currant        | Kidney      | Partial genome       |
|         | Common Carp | Currant        | Spleen      | Partial genome       |
|         | Common Carp | Sabre          | Gill        | Partial genome       |
|         | Common Carp | Sabre          | Kidney      | Partial genome       |
|         | Common Carp | Sabre          | Spleen      | Partial genome       |
| BGTLV-1 | Bluegill    | Waconia        | Spleen      | Near complete genome |
|         | Bluegill    | Waconia        | Gill        | Partial genome       |

## CLuTLV

### *Reverse transcription quantitative PCR screening for CLuTLV*

Based on the sequencing results described in the main paper, PCR (described below) was performed on tissues (gills, heart, kidney, liver, spleen) as well as milt and eggs, collected from farmed adult lumpsuckers (n=933) along the coast of Norway as part of their routine screening program. In addition, samples from Atlantic salmon (n=133) and Ballan wrasse (n=12) were acquired from salmon farms along the coast of Norway as part of their regular screening program and screened by PCR. All CLuTLV-related samples were preserved on RNAlater® (Sigma-Aldrich) at 4°C for appr. 24 hours before storage at -20°C until further procession.

Reverse transcription quantitative Real-time PCR (RT-qPCR) was performed and analyzed as described below using elongation factor 1 alpha (ef1 $\alpha$ ) from lumpsucker or Atlantic salmon as the internal control. Eight dilutions (2-fold) of RNA were used to create a standard curve and determine the efficiencies of the assays. All RT-qPCRs were carried out in triplicates. The tested assays were performed on RNA extracted from tissues from lumpsucker or salmon, simultaneously with ef1 $\alpha$  using qScript XLT 1-step RT-qPCR Toughmix (Quantabio) following the manufacturer's protocol. Thermal cycling and detection/quantification were performed using Quantstudio™ 5 Real-time PCR system (Thermo Fisher Scientific) under the following conditions: cDNA synthesis; 50 °C; 15 min, enzyme activation; 95 °C, 2 min, followed by 40 cycles of denaturation of 95 °C, 5 s and extension; 55 °C; 45 s. Virus-specific primers used for RT-qRTPCR were as follows: CluTLV-F (5' CTGTGGCTGTAAGTGCTCTAC-3'), CluTLV-R (5' GCTGTTCTCTTTCCTCTCCTG-3') and CluTLV-probe (5' TTTCCGATGGTCATTGTGAACCTGG-3').

A total of 922 samples from farmed lumpsucker from Norway have been screened for CLuTLV since first detection in March 2018 and up to January 2020. Samples including milt and eggs from broodstock, lumpsucker fry, and different tissue samples such as gills, liver, spleen and kidney tissues from adult fish, have been tested. Out of total number of samples, 157 tested positive for the virus resulting in a total prevalence of approximately 17%. Of the CLuTLV positive samples, the highest prevalence was found in lumpsucker fry (22%) and spleen (40%), liver (16%) and kidney (15%) from adult fish. CLuTLV has to this date not been found in any reproductive fluids.

Low levels of CLuTLV have also been detected in the kidney of one of 12 Ballan wrasse (*Labrus bergylta*) sampled in May 2018. In addition, 133 samples of Atlantic salmon including fry, smolt and broodstock that were screened for CLuTLV were negative for the virus.

**Supplementary Table S1:** Overview of Genbank accession numbers used for RdRp-motif comparison in Figure 3. RdRp-sequences from novel viruses described in manuscript is extracted from genomic sequence published in given accession number (marked by asterisks).

|                           |                                                 | <b>Genbank accession</b> |
|---------------------------|-------------------------------------------------|--------------------------|
| <b>PMCV</b>               | Piscine myocarditis virus                       | ADP37187                 |
| <b>GSTLV-1</b>            | golden shiner toti-like virus 1                 | MW893687*                |
| <b>CCTLV-1</b>            | common carp toti-like virus 1                   | MW893686*                |
| <b>CLuTLV</b>             | Cyclopterus lumpus toti-like virus              | MW811138*                |
| <b>ToVTJ</b>              | Tianjin totivirus                               | YP_005454251             |
| <b>OMRV</b>               | Omono river virus                               | BAJ21511                 |
| <b>DTV</b>                | drosophila totivirus                            | YP_003289293             |
| <b>AsTV</b>               | Armigeres subalbatus totivirus                  | ACH85916                 |
| <b>IMNV</b>               | infectious myonecrosis virus                    | AAT6723                  |
| <b>GSTLV-2</b>            | golden shiner toti-like virus 2                 | ANH79339                 |
| <b>Beihai toti-like 4</b> | Beihai toti-like virus 4                        | YP_009336713             |
| <b>BGTLV-1</b>            | bluegill toti-like virus 1                      | MW893687*                |
| <b>Hubei toti-like 17</b> | Hubei toti-like virus 17                        | YP_009336917             |
| <b>L. boulandi TLV</b>    | Leptopilina boulandi toti-like virus            | YP_009072448             |
| <b>CYV</b>                | Camponotus yamaokai virus                       | BAR72205                 |
| <b>GLV</b>                | <b>Giardia lamblia virus</b>                    | <b>NP_620070</b>         |
| <b>GCV</b>                | Giardia canis virus                             | ABB36743                 |
| <b>LRV</b>                | <b>Leishmania RNA virus</b>                     | <b>AAB50024</b>          |
| <b>ScV-L-A</b>            | <b>Saccharomyces cerevisiae virus L-A</b>       | <b>AAA50321</b>          |
| <b>ScV-L-BC (La)</b>      | <b>Saccharomyces cerevisiae virus L-BC (La)</b> | <b>AAB02146</b>          |
| <b>TVV1</b>               | <b>Trichomonas vaginalis virus 1</b>            | <b>AAA62868</b>          |
| <b>TVV2</b>               | Trichomonas vaginalis virus 2                   | AF127178_2               |
| <b>Hv190SV</b>            | Helminthosporium victoriae 190S virus           | NP_619670                |

**Table S2**  
Similarity ORF1 of all viruses included  
in phylogenetic tree in Figure 6a

|                                                             | AME30134.1 [Piscine myocarditis-like virus] | Golden shiner toti-like virus-1 (GSTLV-1) | Common carp toti-like virus-1 (CCTLV-1) | AGA37431.1 [Piscine myocarditis virus] | YP_004581249.1 [Piscine myocarditis virus AL V-708] | Cyclopterus lupus toti-like virus (CLuTLV) | Bluegill toti-like virus-1 (BGLTV-1) | YP_009336712.1 [Beihai toti-like virus 4] | dd_Ptor_v3_38990_1 [Planaria torva tricladivirius (PtorTV)] | GAKN01017247 [S. mediterranea-†tricladivirius (SmedTV)] | NC_030295 [Golden shiner toti-like virus-2 (GSTLV-2)] | YP_005454250.1 [Tianjin totivirus] | BAJ21510.1 [Omono River virus] | YP_003289292.1 [Drosophila melanogaster totivirus SW-2009a] | ACH85915.1 [Armigeres subalbatus virus SaX06-AK20] | AAT67230.1 [Penaeid shrimp infectious myonecrosis virus] | BAR72204.1 [Camponotus yamaokai virus] | AAF29444.1 [Trichomonas vaginalis virus 2] | AAA62867.1 [Trichomonas vaginalis virus 1] | AAA50320.1 [Saccharomyces cerevisiae virus L-A] | AAA50506.1 [Saccharomyces cerevisiae virus L-A] | AAB02145.1 [Saccharomyces cerevisiae virus L-BC (La)] | YP_009072447.2 [Leptopilina boulardi Toti-like virus] | NP_619669.2 [Helminthosporium victoriae virus 190S] | AAB50030.1 [Leishmania RNA virus 2] | AAB50023.1 [Leishmania RNA virus 1] | ABB36742.1 [Giardia canis virus] | AAM77693.1 [Giardia lamblia virus] |
|-------------------------------------------------------------|---------------------------------------------|-------------------------------------------|-----------------------------------------|----------------------------------------|-----------------------------------------------------|--------------------------------------------|--------------------------------------|-------------------------------------------|-------------------------------------------------------------|---------------------------------------------------------|-------------------------------------------------------|------------------------------------|--------------------------------|-------------------------------------------------------------|----------------------------------------------------|----------------------------------------------------------|----------------------------------------|--------------------------------------------|--------------------------------------------|-------------------------------------------------|-------------------------------------------------|-------------------------------------------------------|-------------------------------------------------------|-----------------------------------------------------|-------------------------------------|-------------------------------------|----------------------------------|------------------------------------|
| AME30134.1 [Piscine myocarditis-like virus]                 |                                             | 100                                       | 62.18                                   | 76.78                                  | 76.54                                               | 64.68                                      | 36.91                                | 34.52                                     | 31.87                                                       | 26.69                                                   | 27.28                                                 | 31.57                              | 31.57                          | 30.48                                                       | 30.37                                              | 29.2                                                     | 31.57                                  | 28.42                                      | 26.7                                       | 25.03                                           | 24.92                                           | 26.52                                                 | 29.54                                                 | 22.16                                               | 19.2                                | 20.47                               | 30.63                            | 30.94                              |
| Golden shiner toti-like virus-1 (GSTLV-1)                   | 100                                         |                                           | 61.02                                   | 76.42                                  | 76.19                                               | 63.67                                      | 35.71                                | 27.37                                     | 23.55                                                       | 18.87                                                   | 17.68                                                 | 20.57                              | 20.52                          | 26.26                                                       | 22.22                                              | 28.34                                                    | 31.4                                   | 29.27                                      | 26.58                                      | 25.39                                           | 25.28                                           | 27.01                                                 | 20.97                                                 | 20.39                                               | 18.32                               | 19.23                               | 29.4                             | 29.71                              |
| Common carp toti-like virus-1 (CCTLV-1)                     | 62.18                                       | 61.02                                     |                                         | 52.47                                  | 52.58                                               | 44.72                                      | 25.86                                | 20.28                                     | 16.37                                                       | 12.51                                                   | 13.87                                                 | 14.91                              | 14.91                          | 19.68                                                       | 16.5                                               | 21.24                                                    | 24.31                                  | 20.7                                       | 22.12                                      | 23.47                                           | 23.35                                           | 21.52                                                 | 16.38                                                 | 13.62                                               | 11.97                               | 12.07                               | 21.24                            | 21.35                              |
| AGA37431.1 [Piscine myocarditis virus]                      | 76.78                                       | 76.42                                     | 52.47                                   |                                        | 99.77                                               | 62.38                                      | 34.83                                | 27.42                                     | 23.13                                                       | 18.83                                                   | 18.01                                                 | 20.09                              | 20.03                          | 25.76                                                       | 22.26                                              | 28.5                                                     | 32.36                                  | 28.9                                       | 25.82                                      | 25.72                                           | 25.51                                           | 24.84                                                 | 20.59                                                 | 22.05                                               | 18.32                               | 18.14                               | 29.24                            | 29.17                              |
| YP_004581249.1 [Piscine myocarditis virus AL V-708]         | 76.54                                       | 76.19                                     | 52.58                                   | 99.77                                  |                                                     | 62.5                                       | 34.93                                | 27.35                                     | 23.19                                                       | 18.83                                                   | 18.07                                                 | 20.03                              | 19.98                          | 25.91                                                       | 22.32                                              | 28.79                                                    | 32.27                                  | 28.79                                      | 25.93                                      | 25.61                                           | 25.41                                           | 24.84                                                 | 20.59                                                 | 22.14                                               | 18.14                               | 17.96                               | 29.33                            | 29.27                              |
| Cyclopterus lupus toti-like virus (CLuTLV)                  | 64.68                                       | 63.67                                     | 44.72                                   | 62.38                                  | 62.5                                                |                                            | 34.38                                | 28.21                                     | 22.15                                                       | 18.7                                                    | 17.94                                                 | 18.82                              | 18.82                          | 23.91                                                       | 21.54                                              | 29.39                                                    | 30.6                                   | 30.29                                      | 27.2                                       | 23.54                                           | 23.44                                           | 28.54                                                 | 19.93                                                 | 21.49                                               | 17.63                               | 17.91                               | 28.44                            | 28.37                              |
| Bluegill toti-like virus-1 (BGLTV-1)                        | 36.91                                       | 35.71                                     | 25.86                                   | 34.83                                  | 34.93                                               | 34.38                                      |                                      | 34.44                                     | 24.14                                                       | 20.14                                                   | 18.6                                                  | 18.38                              | 18.38                          | 24.64                                                       | 20.89                                              | 30.21                                                    | 33.39                                  | 27.59                                      | 24.29                                      | 22.08                                           | 21.89                                           | 26.24                                                 | 20.33                                                 | 19.38                                               | 16.65                               | 16.03                               | 26.02                            | 26.2                               |
| YP_009336712.1 [Beihai toti-like virus 4]                   | 34.52                                       | 27.37                                     | 20.28                                   | 27.42                                  | 27.35                                               | 28.21                                      | 34.44                                |                                           | 32.7                                                        | 30.96                                                   | 28.38                                                 | 27.67                              | 27.51                          | 31.35                                                       | 28.96                                              | 23.16                                                    | 27.37                                  | 20.64                                      | 22.14                                      | 18.63                                           | 18.63                                           | 20.42                                                 | 29.22                                                 | 23.05                                               | 20.81                               | 20.52                               | 26.35                            | 26.5                               |
| dd_Ptor_v3_38990_1 [Planaria torva tricladivirius (PtorTV)] | 31.87                                       | 23.55                                     | 16.37                                   | 23.13                                  | 23.19                                               | 22.15                                      | 24.14                                | 32.7                                      |                                                             | 45.08                                                   | 30.24                                                 | 30.66                              | 30.46                          | 28.17                                                       | 31.47                                              | 20                                                       | 24.87                                  | 16.46                                      | 18.4                                       | 18.41                                           | 18.47                                           | 17.94                                                 | 31.9                                                  | 19.07                                               | 17.03                               | 17.44                               | 22.3                             | 22.47                              |
| GAKN01017247 [S. mediterranea-†tricladivirius (SmedTV)]     | 26.69                                       | 18.87                                     | 12.51                                   | 18.83                                  | 18.83                                               | 18.7                                       | 20.14                                | 30.96                                     | 45.08                                                       |                                                         | 27.91                                                 | 27.49                              | 27.43                          | 23.88                                                       | 27.25                                              | 15.21                                                    | 18.26                                  | 15.34                                      | 17.73                                      | 16.73                                           | 16.67                                           | 14.88                                                 | 29.47                                                 | 20.61                                               | 19.29                               | 19.47                               | 19.03                            | 19.03                              |
| NC_030295 [Golden shiner toti-like virus-2 (GSTLV-2)]       | 27.28                                       | 17.68                                     | 13.87                                   | 18.01                                  | 18.07                                               | 17.94                                      | 18.6                                 | 28.38                                     | 30.24                                                       | 27.91                                                   |                                                       | 50.72                              | 50.61                          | 45.45                                                       | 50.87                                              | 31.67                                                    | 19.99                                  | 16.09                                      | 15.57                                      | 16.58                                           | 16.52                                           | 16.25                                                 | 28.75                                                 | 18.12                                               | 15.94                               | 17.05                               | 20.38                            | 20.49                              |
| YP_005454250.1 [Tianjin totivirus]                          | 31.57                                       | 20.57                                     | 14.91                                   | 20.09                                  | 20.03                                               | 18.82                                      | 18.38                                | 27.67                                     | 30.66                                                       | 27.49                                                   | 50.72                                                 |                                    | 99.82                          | 58.65                                                       | 65.37                                              | 32.77                                                    | 20.01                                  | 16.7                                       | 15.54                                      | 16.22                                           | 16.16                                           | 18.11                                                 | 31.3                                                  | 17.68                                               | 15.63                               | 15.55                               | 21.13                            | 21.13                              |
| BAJ21510.1 [Omono River virus]                              | 31.57                                       | 20.52                                     | 14.91                                   | 20.03                                  | 19.98                                               | 18.82                                      | 18.38                                | 27.51                                     | 30.46                                                       | 27.43                                                   | 50.61                                                 | 99.82                              |                                | 58.65                                                       | 65.43                                              | 32.77                                                    | 20.07                                  | 16.7                                       | 15.71                                      | 16.22                                           | 16.16                                           | 18.05                                                 | 31.25                                                 | 17.74                                               | 15.75                               | 15.55                               | 20.91                            | 20.91                              |
| YP_003289292.1 [Drosophila melanogaster totivirus SW-2009a] | 30.48                                       | 26.26                                     | 19.68                                   | 25.76                                  | 25.91                                               | 23.91                                      | 24.64                                | 31.35                                     | 28.17                                                       | 23.88                                                   | 45.45                                                 | 58.65                              | 58.65                          |                                                             | 59.72                                              | 42.46                                                    | 25.43                                  | 23.24                                      | 21.62                                      | 21.99                                           | 21.83                                           | 23.18                                                 | 27.71                                                 | 23.83                                               | 21.65                               | 20.94                               | 26.32                            | 26.49                              |
| ACH85915.1 [Armigeres subalbatus virus SaX06-AK20]          | 30.37                                       | 22.22                                     | 16.5                                    | 22.26                                  | 22.32                                               | 21.54                                      | 20.89                                | 28.96                                     | 31.47                                                       | 27.25                                                   | 50.87                                                 | 65.37                              | 65.43                          | 59.72                                                       |                                                    | 37.53                                                    | 21.91                                  | 18.99                                      | 17.92                                      | 18.92                                           | 18.85                                           | 19.79                                                 | 31.37                                                 | 20.29                                               | 17.8                                | 17.7                                | 23.05                            | 23.19                              |
| AAT67230.1 [Penaeid shrimp infectious myonecrosis virus]    | 29.2                                        | 28.34                                     | 21.24                                   | 28.5                                   | 28.79                                               | 29.39                                      | 30.21                                | 23.16                                     | 20                                                          | 15.21                                                   | 31.67                                                 | 32.77                              | 32.77                          | 42.46                                                       | 37.53                                              |                                                          | 27.92                                  | 25.22                                      | 18.96                                      | 24.52                                           | 24.71                                           | 24.81                                                 | 19.83                                                 | 16.49                                               | 14.74                               | 15.35                               | 25.35                            | 25.55                              |
| BAR72204.1 [Camponotus yamaokai virus]                      | 31.57                                       | 31.4                                      | 24.31                                   | 32.36                                  | 32.27                                               | 30.6                                       | 33.39                                | 27.37                                     | 24.87                                                       | 18.26                                                   | 19.99                                                 | 20.01                              | 20.07                          | 25.43                                                       | 21.91                                              | 27.92                                                    |                                        | 22.85                                      | 24.5                                       | 22.39                                           | 22.3                                            | 23.64                                                 | 20.47                                                 | 19.95                                               | 17.75                               | 17.03                               | 27.74                            | 27.94                              |
| AAF29444.1 [Trichomonas vaginalis virus 2]                  | 28.42                                       | 29.27                                     | 20.7                                    | 28.9                                   | 28.79                                               | 30.29                                      | 27.59                                | 20.64                                     | 16.46                                                       | 15.34                                                   | 16.09                                                 | 16.7                               | 16.7                           | 23.24                                                       | 18.99                                              | 25.22                                                    | 22.85                                  |                                            | 22.97                                      | 23.51                                           | 23.62                                           | 24.19                                                 | 16.28                                                 | 17.29                                               | 16.15                               | 16.51                               | 24.56                            | 24.78                              |
| AAA62867.1 [Trichomonas vaginalis virus 1]                  | 26.7                                        | 26.58                                     | 22.12                                   | 25.82                                  | 25.93                                               | 27.2                                       | 24.29                                | 22.14                                     | 18.4                                                        | 17.73                                                   | 15.57                                                 | 15.54                              | 15.71                          | 21.62                                                       | 17.92                                              | 18.96                                                    | 24.5                                   | 22.97                                      |                                            | 24.36                                           | 24.58                                           | 23.85                                                 | 16.84                                                 | 25.91                                               | 20.84                               | 20.75                               | 26.04                            | 26.37                              |
| AAA50320.1 [Saccharomyces cerevisiae virus L-A]             | 25.03                                       | 25.39                                     | 23.47                                   | 25.72                                  | 25.61                                               | 23.54                                      | 22.08                                | 18.63                                     | 18.41                                                       | 16.73                                                   | 16.58                                                 | 16.22                              | 16.22                          | 21.99                                                       | 18.92                                              | 24.52                                                    | 22.39                                  | 23.51                                      | 24.36                                      |                                                 | 99.85                                           | 25.38                                                 | 14.79                                                 | 19.38                                               | 18.06                               | 18.57                               | 27.2                             | 27.13                              |
| AAA50506.1 [Saccharomyces cerevisiae virus L-A]             | 24.92                                       | 25.28                                     | 23.35                                   | 25.51                                  | 25.41                                               | 23.44                                      | 21.89                                | 18.63                                     | 18.47                                                       | 16.67                                                   | 16.52                                                 | 16.16                              | 16.16                          | 21.83                                                       | 18.85                                              | 24.71                                                    | 22.3                                   | 23.62                                      | 24.58                                      | 99.85                                           |                                                 | 25.38                                                 | 14.68                                                 | 19.48                                               | 18.06                               | 18.57                               | 27.1                             | 27.03                              |
| AAB02145.1 [Saccharomyces cerevisiae virus L-BC (La)]       | 26.52                                       | 27.01                                     | 21.52                                   | 24.84                                  | 24.84                                               | 28.54                                      | 26.24                                | 20.42                                     | 17.94                                                       | 14.88                                                   | 16.25                                                 | 18.11                              | 18.05                          | 23.18                                                       | 19.79                                              | 24.81                                                    | 23.64                                  | 24.19                                      | 23.85                                      | 25.38                                           | 25.38                                           |                                                       | 17.27                                                 | 17.83                                               | 17.37                               | 19.82                               | 24.98                            | 24.48                              |
| YP_009072447.2 [Leptopilina boulardi Toti-like virus]       | 29.54                                       | 20.97                                     | 16.38                                   | 20.59                                  | 20.59                                               | 19.93                                      | 20.33                                | 29.22                                     | 31.9                                                        | 29.47                                                   | 28.75                                                 | 31.3                               | 31.25                          | 27.71                                                       | 31.37                                              | 19.83                                                    | 20.47                                  | 16.28                                      | 16.84                                      | 14.79                                           | 14.68                                           | 17.27                                                 |                                                       | 17.24                                               | 15.15                               | 15.2                                | 19.61                            | 19.67                              |
| NP_619669.2 [Helminthosporium victoriae virus 190S]         | 22.16                                       | 20.39                                     | 13.62                                   | 22.05                                  | 22.14                                               | 21.49                                      | 19.38                                | 23.05                                     | 19.07                                                       | 20.61                                                   | 18.12                                                 | 17.68                              | 17.74                          | 23.83                                                       | 20.29                                              | 16.49                                                    | 19.95                                  | 17.29                                      | 25.91                                      | 19.38                                           | 19.48                                           | 17.83                                                 | 17.24                                                 |                                                     | 33.67                               | 34.17                               | 19.96                            | 19.7                               |
| AAB50030.1 [Leishmania RNA virus 2]                         | 19.2                                        | 18.32                                     | 11.97                                   | 18.32                                  | 18.14                                               | 17.63                                      | 16.65                                | 20.81                                     | 17.03                                                       | 19.29                                                   | 15.94                                                 | 15.63                              | 15.75                          | 21.65                                                       | 17.8                                               | 14.74                                                    | 17.75                                  | 16.15                                      | 20.84                                      | 18.06                                           | 18.06                                           | 17.37                                                 | 15.15                                                 | 33.67                                               |                                     | 66.36                               | 18.82                            | 18.84                              |
| AAB50023.1 [Leishmania RNA virus 1]                         | 20.47                                       | 19.23                                     | 12.07                                   | 18.14                                  | 17.96                                               | 17.91                                      | 16.03                                | 20.52                                     | 17.44                                                       | 19.47                                                   | 17.05                                                 | 15.55                              | 15.55                          | 20.94                                                       | 17.7                                               | 15.35                                                    | 17.03                                  | 16.51                                      | 20.75                                      | 18.57                                           | 18.57                                           | 19.82                                                 | 15.2                                                  | 34.17                                               | 66.36                               |                                     | 17.62                            | 17.72                              |
| ABB36742.1 [Giardia canis virus]                            | 30.63                                       | 29.4                                      | 21.24                                   | 29.24                                  | 29.33                                               | 28.44                                      | 26.02                                | 26.35                                     | 22.3                                                        | 19.03                                                   | 20.38                                                 | 21.13                              | 20.91                          | 26.32                                                       | 23.05                                              | 25.35                                                    | 27.74                                  | 24.56                                      | 26.04                                      | 27.2                                            | 27.1                                            | 24.98                                                 | 19.61                                                 | 19.96                                               | 18.82                               | 17.62                               |                                  | 98.87                              |
| AAM77693.1 [Giardia lamblia virus]                          | 30.94                                       | 29.71                                     | 21.35                                   | 29.17                                  | 29.27                                               | 28.37                                      | 26.2                                 | 26.5                                      | 22.47                                                       | 19.03                                                   | 20.49                                                 | 21.13                              | 20.91                          | 26.49                                                       | 23.19                                              | 25.55                                                    | 27.94                                  | 24.78                                      | 26.37                                      | 27.13                                           | 27.03                                           | 24.48                                                 | 19.67                                                 | 19.7                                                | 18.84                               | 17.72                               | 98.87                            |                                    |

**Table S3**  
Similarity ORF2 of all viruses included  
in phylogenetic tree in Figure 6b

|                                                              | AFQ55381.1[Saccharomyces cerevisiae virus L-A-lus] | AHF27234.1[Saccharomyces cerevisiae virus L-A-2] | NP_620493.1[Saccharomyces cerevisiae virus L-A] | NP_619670.2[Helminthosporium victoriae virus 190S] | AAB50031.1[Leishmania RNA virus 2] | AAB50024.1[Leishmania RNA virus 1] | AAF29445.1[Trichomonas vaginalis virus 2] | AAA62868.1[Trichomonas vaginalis virus 1] | AME30135.1 [Piscine myocarditis-like virus] | Golden shiner toti-like virus-1 (GSTLV-1) | Common carp toti-like virus-1 (CCTLV-1) | YP_004581250.1 [Piscine myocarditis virus AL V-708] | Cyclopterus lupus toti-like virus (CLuTV) | YP_0093336917.1[Hubei toti-like virus 17] | YP_009072448.1[Leptopilina boulardi Toti-like virus] | YP_009336713.1[Beihai toti-like virus 4] | Bluegill toti-like virus-1 (BGLTV-1) | ABB36743.1[Giardia canis virus] | AAM77694.1 [Giardia lamblia virus] | dd_Ptor_v3_38990_1_1[Planaria torva tricladivirius (PtorTV)] | GAKN01017247 [S. mediterranea-†tricladivirius (SmedTV)] | BAR72205.1[Camponotus yamaokai virus] | NC_030295[Golden shiner toti-like virus-2 (GSTLV-2)] | YP_005454251.1[Tianjin totivirus] | BAJ21511.1[Omono River virus] | YP_003289293.1[Drosophila melanogaster totivirus SW-2009a] | ACH85916.1 [Armigeres subalbatus virus SaX06-AK20] | AAT67231.2[Penaeid shrimp infectious myonecrosis virus] |
|--------------------------------------------------------------|----------------------------------------------------|--------------------------------------------------|-------------------------------------------------|----------------------------------------------------|------------------------------------|------------------------------------|-------------------------------------------|-------------------------------------------|---------------------------------------------|-------------------------------------------|-----------------------------------------|-----------------------------------------------------|-------------------------------------------|-------------------------------------------|------------------------------------------------------|------------------------------------------|--------------------------------------|---------------------------------|------------------------------------|--------------------------------------------------------------|---------------------------------------------------------|---------------------------------------|------------------------------------------------------|-----------------------------------|-------------------------------|------------------------------------------------------------|----------------------------------------------------|---------------------------------------------------------|
| AFQ55381.1[Saccharomyces cerevisiae virus L-A-lus]           |                                                    | 98.27                                            | 96.08                                           | 25.47                                              | 22.9                               | 26.65                              | 23.67                                     | 23.01                                     | 23.35                                       | 29.31                                     | 22.67                                   | 18.9                                                | 16.88                                     | 18.08                                     | 19.92                                                | 21.59                                    | 18.76                                | 36.22                           | 20.3                               | 20.98                                                        | 25.36                                                   | 17.82                                 | 19.1                                                 | 41.19                             | 20.04                         | 45.83                                                      | 18.4                                               | 19.73                                                   |
| AHF27234.1[Saccharomyces cerevisiae virus L-A-2]             | 98.27                                              |                                                  | 95.88                                           | 25.54                                              | 23.03                              | 26.52                              | 23.48                                     | 23.14                                     | 22.96                                       | 28.82                                     | 22.41                                   | 18.77                                               | 16.69                                     | 18.41                                     | 20.18                                                | 21.91                                    | 18.76                                | 36.22                           | 20.19                              | 20.6                                                         | 25.36                                                   | 17.43                                 | 19.16                                                | 40.78                             | 19.78                         | 45.49                                                      | 17.82                                              | 19.54                                                   |
| NP_620493.1[Saccharomyces cerevisiae virus L-A]              | 96.08                                              | 95.88                                            |                                                 | 25.6                                               | 23.55                              | 26.39                              | 23.54                                     | 23.27                                     | 23.15                                       | 29.06                                     | 22.41                                   | 18.96                                               | 16.49                                     | 18.08                                     | 20.44                                                | 21.65                                    | 18.76                                | 36.12                           | 20.07                              | 21.23                                                        | 25.3                                                    | 17.69                                 | 19.29                                                | 40.22                             | 19.53                         | 44.44                                                      | 18.2                                               | 19.35                                                   |
| NP_619670.2[Helminthosporium victoriae virus 190S]           | 25.47                                              | 25.54                                            | 25.6                                            |                                                    | 50.92                              | 52.34                              | 39.89                                     | 38.39                                     | 38.24                                       | 39.16                                     | 37.31                                   | 34.59                                               | 34.02                                     | 29.96                                     | 33.66                                                | 35.87                                    | 33.59                                | 20.52                           | 30.16                              | 33.26                                                        | 34.09                                                   | 29.78                                 | 29.74                                                | 37.31                             | 32.8                          | 37.62                                                      | 30.42                                              | 31.09                                                   |
| AAB50031.1[Leishmania RNA virus 2]                           | 22.9                                               | 23.03                                            | 23.55                                           | 50.92                                              |                                    | 61.97                              | 44.25                                     | 42.37                                     | 39.55                                       | 39.48                                     | 37.77                                   | 36.92                                               | 36.02                                     | 34.5                                      | 34.87                                                | 39.14                                    | 36.28                                | 18.28                           | 30.9                               | 35.19                                                        | 32.03                                                   | 34.79                                 | 34.13                                                | 36.52                             | 34.47                         | 38.07                                                      | 34.85                                              | 35.46                                                   |
| AAB50024.1[Leishmania RNA virus 1]                           | 26.65                                              | 26.52                                            | 26.39                                           | 52.34                                              | 61.97                              |                                    | 44.91                                     | 44.24                                     | 40.55                                       | 42.71                                     | 37.91                                   | 33.08                                               | 31.92                                     | 29.84                                     | 30.73                                                | 34.38                                    | 33.44                                | 21.91                           | 28.63                              | 32.35                                                        | 34.17                                                   | 29.74                                 | 30.53                                                | 36.62                             | 30.57                         | 38.92                                                      | 29.94                                              | 30.07                                                   |
| AAF29445.1[Trichomonas vaginalis virus 2]                    | 23.67                                              | 23.48                                            | 23.54                                           | 39.89                                              | 44.25                              | 44.91                              |                                           | 49.82                                     | 34.06                                       | 35.8                                      | 35.38                                   | 31.38                                               | 28.64                                     | 28.52                                     | 30.01                                                | 31.7                                     | 31.73                                | 18.55                           | 26.45                              | 31.12                                                        | 33.05                                                   | 28.89                                 | 29.94                                                | 33.29                             | 28.45                         | 33.97                                                      | 27.78                                              | 28.92                                                   |
| AAA62868.1[Trichomonas vaginalis virus 1]                    | 23.01                                              | 23.14                                            | 23.27                                           | 38.39                                              | 42.37                              | 44.24                              | 49.82                                     |                                           | 34.87                                       | 36.38                                     | 34.23                                   | 30.81                                               | 30.83                                     | 33.84                                     | 33.79                                                | 37.03                                    | 35.47                                | 20.21                           | 30.71                              | 32.87                                                        | 33.59                                                   | 33.81                                 | 32.37                                                | 35.26                             | 31.22                         | 38.31                                                      | 31.05                                              | 33.78                                                   |
| AME30135.1 [Piscine myocarditis-like virus]                  | 23.35                                              | 22.96                                            | 23.15                                           | 38.24                                              | 39.55                              | 40.55                              | 34.06                                     | 34.87                                     |                                             | 100                                       | 76.79                                   | 60.14                                               | 54.6                                      | 39.14                                     | 36.25                                                | 42.6                                     | 38.23                                | 22.15                           | 34.98                              | 39.46                                                        | 38.45                                                   | 35.02                                 | 32.88                                                | 39.57                             | 34                            | 39.66                                                      | 33.05                                              | 34.64                                                   |
| Golden shiner toti-like virus-1 (GSTLV-1)                    | 29.31                                              | 28.82                                            | 29.06                                           | 39.16                                              | 39.48                              | 42.71                              | 35.8                                      | 36.38                                     | 100                                         |                                           | 76.77                                   | 60.09                                               | 54.55                                     | 39.29                                     | 36.22                                                | 42.54                                    | 38.2                                 | 29.39                           | 34.92                              | 39.4                                                         | 40.58                                                   | 34.94                                 | 32.81                                                | 39.57                             | 33.93                         | 39.66                                                      | 32.98                                              | 34.57                                                   |
| Common carp toti-like virus-1 (CCTLV-1)                      | 22.67                                              | 22.41                                            | 22.41                                           | 37.31                                              | 37.77                              | 37.91                              | 35.38                                     | 34.23                                     | 76.79                                       | 76.77                                     |                                         | 61.12                                               | 54                                        | 39.03                                     | 36.94                                                | 43.07                                    | 38.13                                | 21.8                            | 34.24                              | 38.03                                                        | 39.13                                                   | 35.93                                 | 32.15                                                | 39.64                             | 34.39                         | 39.3                                                       | 32.63                                              | 34.64                                                   |
| YP_004581250.1 [Piscine myocarditis virus AL V-708]          | 18.9                                               | 18.77                                            | 18.96                                           | 34.59                                              | 36.92                              | 33.08                              | 31.38                                     | 30.81                                     | 60.14                                       | 60.09                                     | 61.12                                   |                                                     | 62.5                                      | 42.59                                     | 39.08                                                | 42.71                                    | 40.91                                | 18.55                           | 33.24                              | 38.17                                                        | 34.22                                                   | 41.77                                 | 36.72                                                | 36.44                             | 35.08                         | 38.28                                                      | 36                                                 | 38.88                                                   |
| Cyclopterus lupus toti-like virus (CLuTV)                    | 16.88                                              | 16.69                                            | 16.49                                           | 34.02                                              | 36.02                              | 31.92                              | 28.64                                     | 30.83                                     | 54.6                                        | 54.55                                     | 54                                      | 62.5                                                |                                           | 45.71                                     | 38.79                                                | 42.52                                    | 42.06                                | 16.72                           | 30.09                              | 35.29                                                        | 31.44                                                   | 44.77                                 | 40.08                                                | 37.76                             | 36.07                         | 39.08                                                      | 36.7                                               | 40.59                                                   |
| YP_0093336917.1[Hubei toti-like virus 17]                    | 18.08                                              | 18.41                                            | 18.08                                           | 29.96                                              | 34.5                               | 29.84                              | 28.52                                     | 33.84                                     | 39.14                                       | 39.29                                     | 39.03                                   | 42.59                                               | 45.71                                     |                                           | 41.67                                                | 44.85                                    | 42.72                                | 18.99                           | 33.43                              | 40.83                                                        | 34.32                                                   | 40.43                                 | 39.95                                                | 38.4                              | 36.54                         | 39.35                                                      | 38.61                                              | 40.15                                                   |
| YP_009072448.1[Leptopilina boulardi Toti-like virus]         | 19.92                                              | 20.18                                            | 20.44                                           | 33.66                                              | 34.87                              | 30.73                              | 30.01                                     | 33.79                                     | 36.25                                       | 36.22                                     | 36.94                                   | 39.08                                               | 38.79                                     | 41.67                                     |                                                      | 42.52                                    | 43.04                                | 18.33                           | 32.3                               | 40.22                                                        | 33.3                                                    | 34.58                                 | 38.34                                                | 41.27                             | 40.71                         | 43.58                                                      | 40.57                                              | 40.73                                                   |
| YP_009336713.1[Beihai toti-like virus 4]                     | 21.59                                              | 21.91                                            | 21.65                                           | 35.87                                              | 39.14                              | 34.38                              | 31.7                                      | 37.03                                     | 42.6                                        | 42.54                                     | 43.07                                   | 42.71                                               | 42.52                                     | 44.85                                     | 42.52                                                |                                          | 50.17                                | 20.55                           | 35.44                              | 46.62                                                        | 40.76                                                   | 39.95                                 | 39.19                                                | 41.97                             | 40.36                         | 43.07                                                      | 40.79                                              | 42.99                                                   |
| Bluegill toti-like virus-1 (BGLTV-1)                         | 18.76                                              | 18.76                                            | 18.76                                           | 33.59                                              | 36.28                              | 33.44                              | 31.73                                     | 35.47                                     | 38.23                                       | 38.2                                      | 38.13                                   | 40.91                                               | 42.06                                     | 42.72                                     | 43.04                                                | 50.17                                    |                                      | 18.29                           | 32.38                              | 42.7                                                         | 37.19                                                   | 37.03                                 | 36.48                                                | 38.95                             | 38.77                         | 40.09                                                      | 38.78                                              | 39.37                                                   |
| ABB36743.1[Giardia canis virus]                              | 36.22                                              | 36.22                                            | 36.12                                           | 20.52                                              | 18.28                              | 21.91                              | 18.55                                     | 20.21                                     | 22.15                                       | 29.39                                     | 21.8                                    | 18.55                                               | 16.72                                     | 18.99                                     | 18.33                                                | 20.55                                    | 18.29                                |                                 | 54.94                              | 19.26                                                        | 24.16                                                   | 16.53                                 | 16.13                                                | 33.6                              | 18.18                         | 37.69                                                      | 17.19                                              | 17.35                                                   |
| AAM77694.1 [Giardia lamblia virus]                           | 20.3                                               | 20.19                                            | 20.07                                           | 30.16                                              | 30.9                               | 28.63                              | 26.45                                     | 30.71                                     | 34.98                                       | 34.92                                     | 34.24                                   | 33.24                                               | 30.09                                     | 33.43                                     | 32.3                                                 | 35.44                                    | 32.38                                | 54.94                           |                                    | 34.06                                                        | 30.95                                                   | 29.69                                 | 28.34                                                | 33.6                              | 32.09                         | 37.69                                                      | 30.42                                              | 30.51                                                   |
| dd_Ptor_v3_38990_1_1[Planaria torva tricladivirius (PtorTV)] | 20.98                                              | 20.6                                             | 21.23                                           | 33.26                                              | 35.19                              | 32.35                              | 31.12                                     | 32.87                                     | 39.46                                       | 39.4                                      | 38.03                                   | 38.17                                               | 35.29                                     | 40.83                                     | 40.22                                                | 46.62                                    | 42.7                                 | 19.26                           | 34.06                              |                                                              | 60.1                                                    | 32.93                                 | 36.44                                                | 41.3                              | 39.48                         | 44.01                                                      | 36.5                                               | 39.2                                                    |
| GAKN01017247 [S. mediterranea-†tricladivirius (SmedTV)]      | 25.36                                              | 25.36                                            | 25.3                                            | 34.09                                              | 32.03                              | 34.17                              | 33.05                                     | 33.59                                     | 38.45                                       | 40.58                                     | 39.13                                   | 34.22                                               | 31.44                                     | 34.32                                     | 33.3                                                 | 40.76                                    | 37.19                                | 24.16                           | 30.95                              | 60.1                                                         |                                                         | 28.34                                 | 30.85                                                | 41.57                             | 33.74                         | 42.9                                                       | 31.02                                              | 33.83                                                   |
| BAR72205.1[Camponotus yamaokai virus]                        | 17.82                                              | 17.43                                            | 17.69                                           | 29.78                                              | 34.79                              | 29.74                              | 28.89                                     | 33.81                                     | 35.02                                       | 34.94                                     | 35.93                                   | 41.77                                               | 44.77                                     | 40.43                                     | 34.58                                                | 39.95                                    | 37.03                                | 16.53                           | 29.69                              | 32.93                                                        | 28.34                                                   |                                       | 38.53                                                | 38.81                             | 37.44                         | 38.52                                                      | 39.04                                              | 39.51                                                   |
| NC_030295[Golden shiner toti-like virus-2 (GSTLV-2)]         | 19.1                                               | 19.16                                            | 19.29                                           | 29.74                                              | 34.13                              | 30.53                              | 29.94                                     | 32.37                                     | 32.88                                       | 32.81                                     | 32.15                                   | 36.72                                               | 40.08                                     | 39.95                                     | 38.34                                                | 39.19                                    | 36.48                                | 16.13                           | 28.34                              | 36.44                                                        | 30.85                                                   | 38.53                                 |                                                      | 68.51                             | 65.29                         | 70.57                                                      | 64.99                                              | 68.97                                                   |
| YP_005454251.1[Tianjin totivirus]                            | 41.19                                              | 40.78                                            | 40.22                                           | 37.31                                              | 36.52                              | 36.62                              | 33.29                                     | 35.26                                     | 39.57                                       | 39.57                                     | 39.64                                   | 36.44                                               | 37.76                                     | 38.4                                      | 41.27                                                | 41.97                                    | 38.95                                | 33.6                            | 33.6                               | 41.3                                                         | 41.57                                                   | 38.81                                 | 68.51                                                |                                   | 100                           | 84.24                                                      | 75.47                                              | 73.04                                                   |
| BAJ21511.1[Omono River virus]                                | 20.04                                              | 19.78                                            | 19.53                                           | 32.8                                               | 34.47                              | 30.57                              | 28.45                                     | 31.22                                     | 34                                          | 33.93                                     | 34.39                                   | 35.08                                               | 36.07                                     | 36.54                                     | 40.71                                                | 40.36                                    | 38.77                                | 18.18                           | 32.09                              | 39.48                                                        | 33.74                                                   | 37.44                                 | 65.29                                                | 100                               |                               | 84.08                                                      | 73                                                 | 69.57                                                   |
| YP_003289293.1[Drosophila melanogaster totivirus SW-2009a]   | 45.83                                              | 45.49                                            | 44.44                                           | 37.62                                              | 38.07                              | 38.92                              | 33.97                                     | 38.31                                     | 39.66                                       | 39.66                                     | 39.3                                    | 38.28                                               | 39.08                                     | 39.35                                     | 43.58                                                | 43.07                                    | 40.09                                | 37.69                           | 37.69                              | 44.01                                                        | 42.9                                                    | 38.52                                 | 70.57                                                | 84.24                             | 84.08                         |                                                            | 76.67                                              | 73.03                                                   |
| ACH85916.1 [Armigeres subalbatus virus SaX06-AK20]           | 18.4                                               | 17.82                                            | 18.2                                            | 30.42                                              | 34.85                              | 29.94                              | 27.78                                     | 31.05                                     | 33.05                                       | 32.98                                     | 32.63                                   | 36                                                  | 36.7                                      | 38.61                                     | 40.57                                                | 40.79                                    | 38.78                                | 17.19                           | 30.42                              | 36.5                                                         | 31.02                                                   | 39.04                                 | 64.99                                                | 75.47                             | 73                            | 76.67                                                      |                                                    | 72.1                                                    |
| AAT67231.2[Penaeid shrimp infectious myonecrosis virus]      | 19.73                                              | 19.54                                            | 19.35                                           | 31.09                                              | 35.46                              | 30.07                              | 28.92                                     | 33.78                                     | 34.64                                       | 34.57                                     | 34.64                                   | 38.88                                               | 40.59                                     | 40.15                                     | 40.73                                                | 42.99                                    | 39.37                                | 17.35                           | 30.51                              | 39.2                                                         | 33.83                                                   | 39.51                                 | 68.97                                                | 73.04                             | 69.57                         | 73.03                                                      |                                                    |                                                         |
